# Supplementary material
Source: publisher site journal article supplement (https://www.spandidos-publications.com/2121/downloadSupplementary)

Figure S1. miR-451a expression levels following transfection. The levels of miR-451a increased or decreased in U266 cells transfected with miR-451a mimic or miR-451a inhibitor, respectively. Transfection with miR-451a mimic/inhibitor negative control did not significantly alter miR-451a levels. \*\*\* $P < 0.0001$ . miR, microRNA.

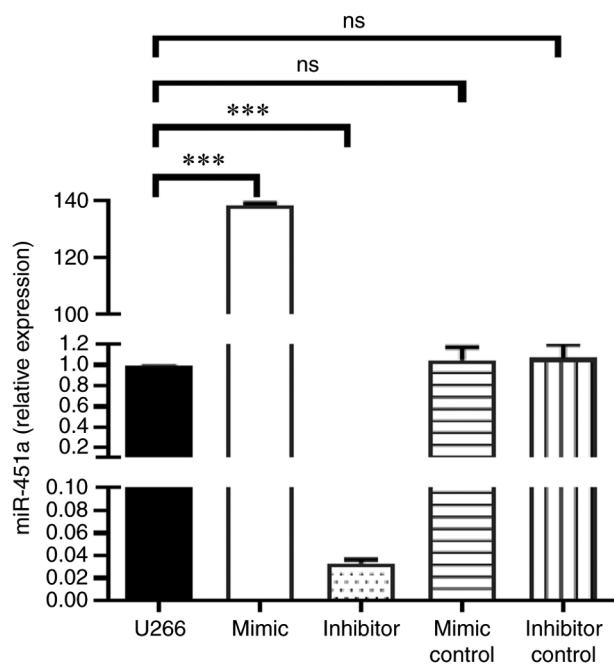

Supplement: Supplementary file 1 [file downloadSupplementary]
